# Supplementary material for: Phenylalanine-tRNA aminoacylation is compromised by ALS/FTD-associated C9orf72 C4G2 repeat RNA
Source: Research Square preprint supplement (doi:10.21203/rs.3.rs-2166624/v1), 2022-11-01
Supplement: Supplementary file 1 [file 155898035f8ba0623e7cc09d.xlsx]

## Sheet: Sheet1
Nuclear fraction
Gel band	Protein name	Accession	Gene	MW(kDa)	C4G2	S1m	Fold change
1	Cytoplasmic FMR1-interacting protein 2	CYFP2_MOUSE	Cyfip2	146	41	8	5.13
	Contactin-1	CNTN1_MOUSE	Cntn1	113	54	17	3.18
	Serine/threonine-protein kinase TAO1	TAOK1_MOUSE	Taok1	116	73	4	18.25
	Serine/threonine-protein kinase TAO2	TAOK2_MOUSE	Taok2	139	54	14	3.86
2	Phenylalanine--tRNA ligase beta subunit	SYFB_MOUSE	Farsb	66	28	/
	Heterogeneous nuclear ribonucleoprotein L	HNRPL_MOUSE	Hnrnpl	64	85	20	4.25
3	2',3'-cyclic-nucleotide 3'-phosphodiesterase	CN37_MOUSE	Cnp	47	76	9	8.44
	Flotillin-2	FLOT2_MOUSE	Flot2	47	19	4	4.75
	Flotillin-1	FLOT1_MOUSE	Flot1	48	20	/
4	Nucleophosmin	NPM_MOUSE	Npm1	33	22	/
	Eukaryotic translation initiation factor 2 subunit 1	IF2A_MOUSE	Eif2s1	36	13	/
Cytoplasmic fraction 2
Gel band	Protein name	Accession	Gene	MW(kDa)	C4G2	S1m	Fold change
1	Phenylalanine--tRNA ligase beta subunit	SYFB_MOUSE	Farsb	66	159	21	7.57
2	Serine--tRNA ligase, cytoplasmic	SYSC_MOUSE	Sars	58	77	11	7.00
3	Phenylalanine--tRNA ligase alpha subunit	SYFA_MOUSE	Farsa	58	100	27	3.70
