# Supplementary material for: Phenylalanine-tRNA aminoacylation is compromised by ALS/FTD-associated C9orf72 C4G2 repeat RNA
Source: Research Square preprint supplement (doi:10.21203/rs.3.rs-2166624/v1), 2022-11-01
Supplement: Supplementary file 2 [file b957604083084da9939d5f5b.xlsx]

## Sheet: Fibroblasts
Cell line	Age	Sex	Disease type	Disease duration
C9orf72 fibroblasts-1	57	M	ALS-Leg	>4 years
C9orf72 fibroblasts-2	61	M	ALS-Bulbar	3.5 years
C9orf72 fibroblasts-3	42	F	ALS-Leg	N/A
Control fibroblasts-1	34	M	Control	N/A
Control fibroblasts-2	34	M	Control	N/A
Control fibroblasts-3	48	F	Control	N/A

## Sheet: Lymphoblasts
	DOB	Sex	Pathological Diagnosis
Human lymphoblastoid cell line, C9+; R0041494	9/27/1963	F	ALS
Human lymphoblastoid cell line, C9+; R0041495	12/31/1953	F	ALS
Human lymphoblastoid cell line, C9+; R0042873	5/26/1955	M	ALS
Human lymphoblastoid cell line, C9+; R0041487	12/7/1966	M	ALS
Human lymphoblastoid cell line, C9+; R0042890	7/13/1954	M	ALS
Human lymphoblastoid cell line, C9+; R0044182	2/9/1938	F	ALS
Human lymphoblastoid cell line, control; R0044939	7/30/1981	M	Non-affected parent of a child with LEUCODYSTROPHY
Human lymphoblastoid cell line, control; R0044940	4/29/1982	F	Non-affected parent of a child with LEUCODYSTROPHY
Human lymphoblastoid cell line, control; R0044625	5/10/1963	M	Non-affected parent of a child with LEUCODYSTROPHY
Human lymphoblastoid cell line, control; R0044713	8/14/1978	F	Non-affected parent of a child with LEUCODYSTROPHY
Human lymphoblastoid cell line, control; R0044922	3/18/1974	F	Non-affected parent of a child with LEUCODYSTROPHY
Human lymphoblastoid cell line, control; R0045439	4/4/1981	F	Non-affected parent of a child with LEUCODYSTROPHY
